# Supplementary material
Source: publisher figshare collection journal article supplement (https://asha.figshare.com/articles/dataset/_/12592190)

Supplemental Figure S1. Scatterplot depicting the relationship between ChangeSess and 2-week follow-up for SPT-Blocked items.

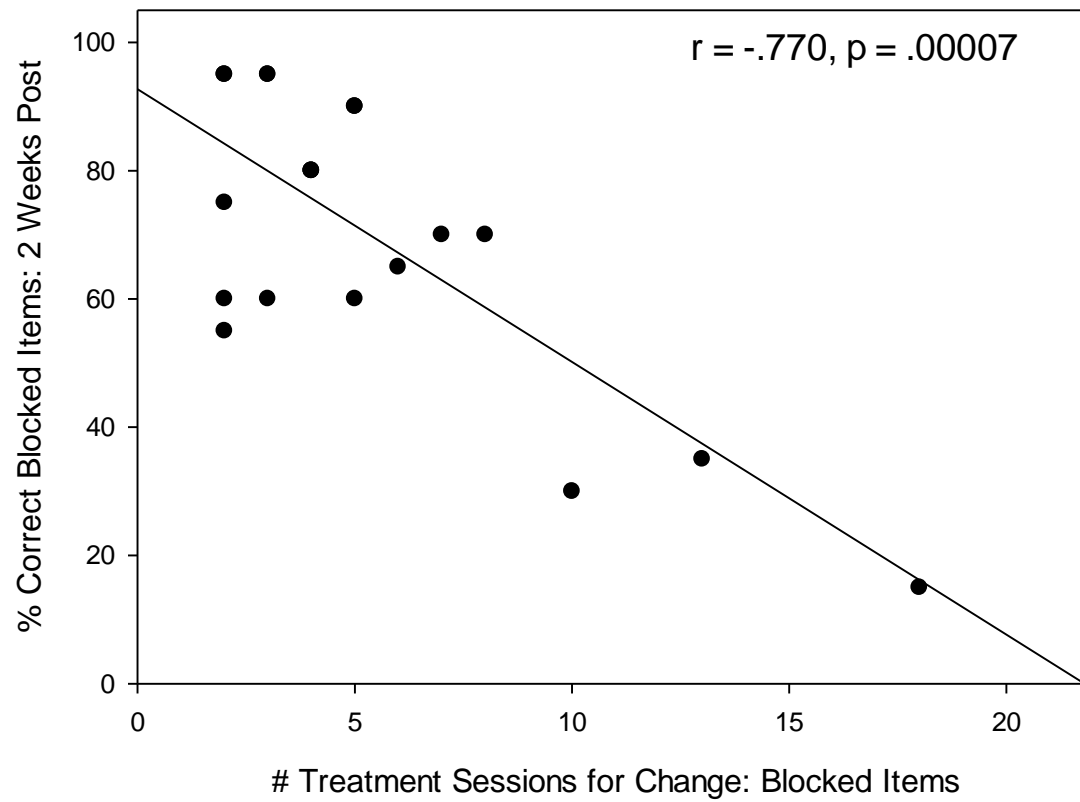

Supplemental Figure S2. Scatterplot depicting the relationship between ChangeSess and 2-week follow-up for SPT-Random items.

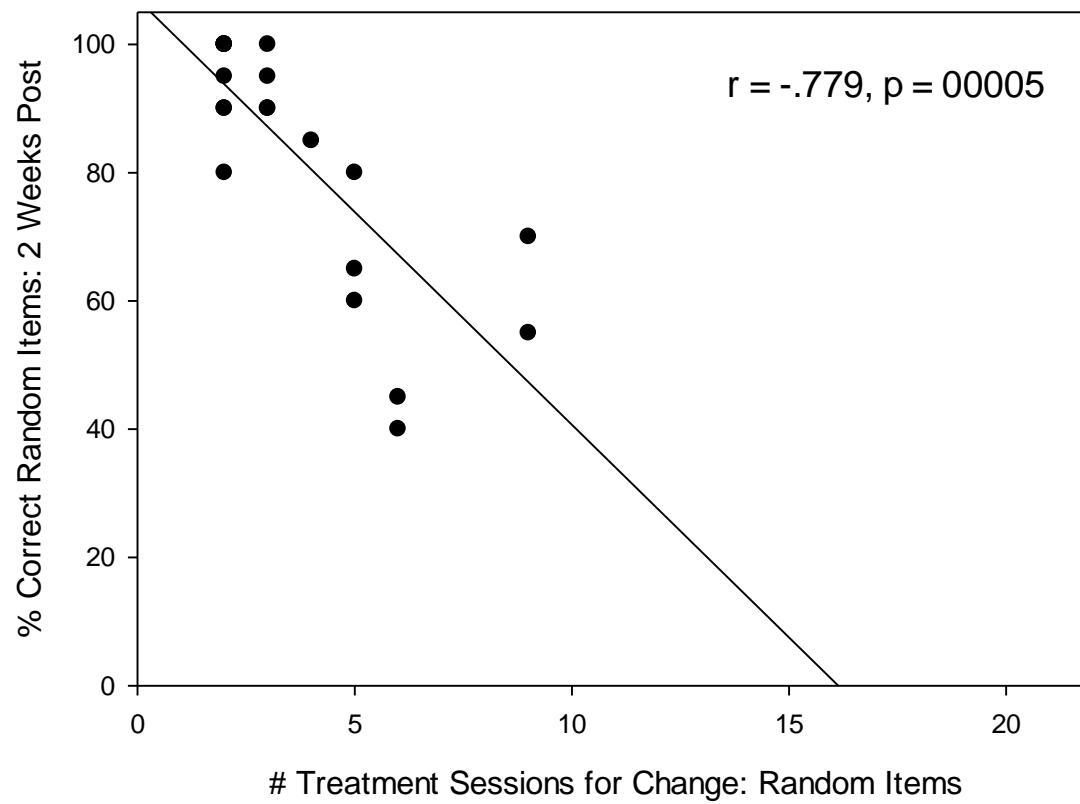

Supplemental Figure S3. Scatterplot depicting the relationship between ChangeSess and 10-week follow-up for SPT-Blocked items.

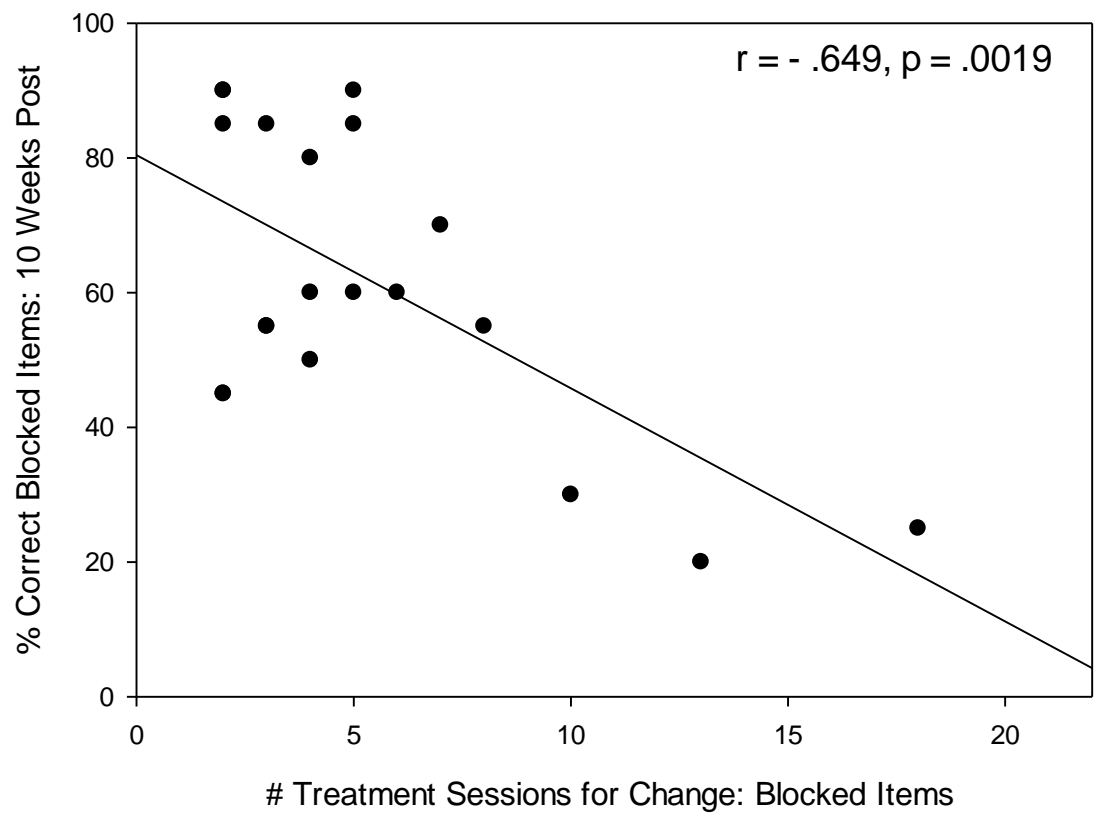

Supplemental Figure S4. Scatterplot depicting the relationship between ChangeSess and 10-week follow-up for SPT-Random items.

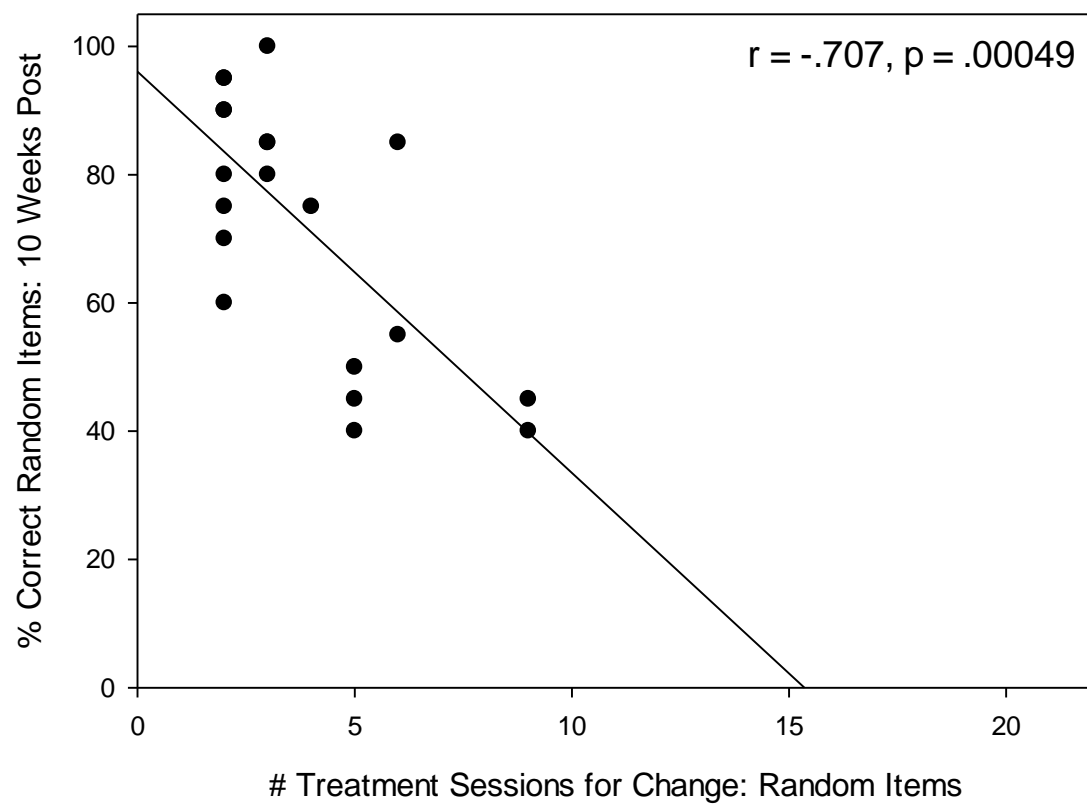

Supplemental Figure S5. Scatterplot depicting the relationship between MasterySess and 2-week follow-up for SPT-Blocked items.

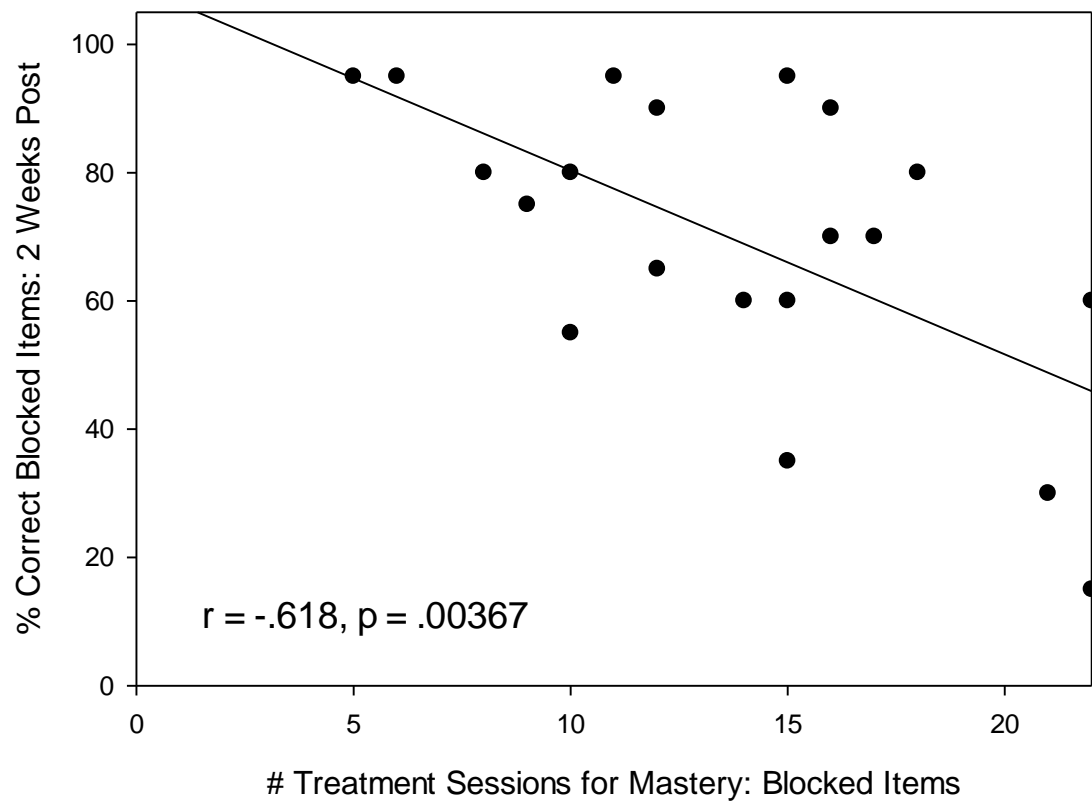

Supplemental Figure S6. Scatterplot depicting the relationship between MasterySess and 2-week follow-up for SPT-Random items.

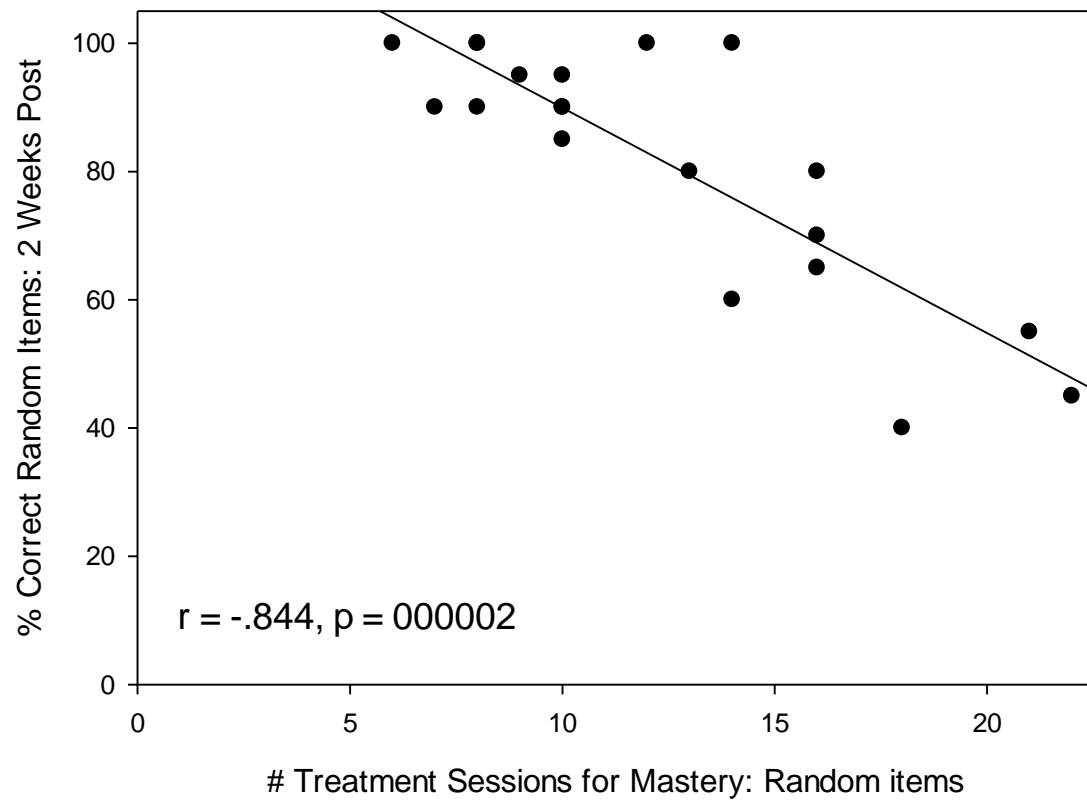

Supplemental Figure S7. Scatterplot depicting the relationship between MasterySess and 10-week follow-up for SPT-Random items.

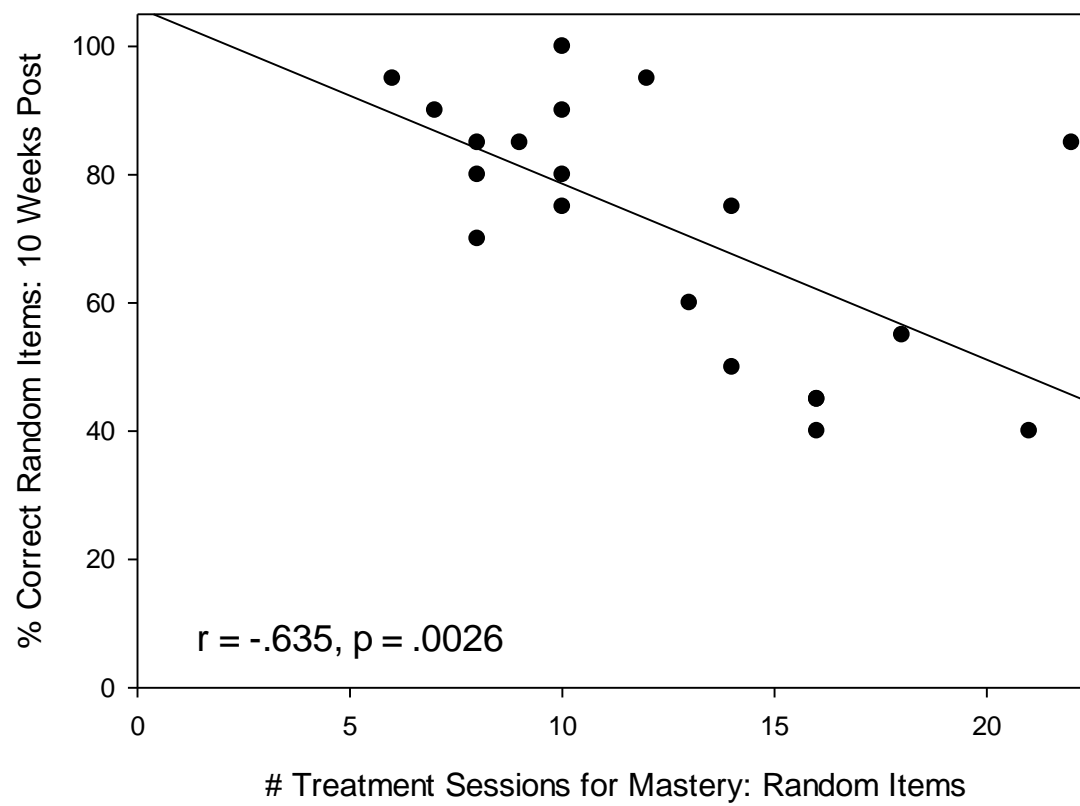

Supplemental Figure S8. Scatterplot depicting the relationship between ChangeTE and 10-week follow-up for SPT-Random items.

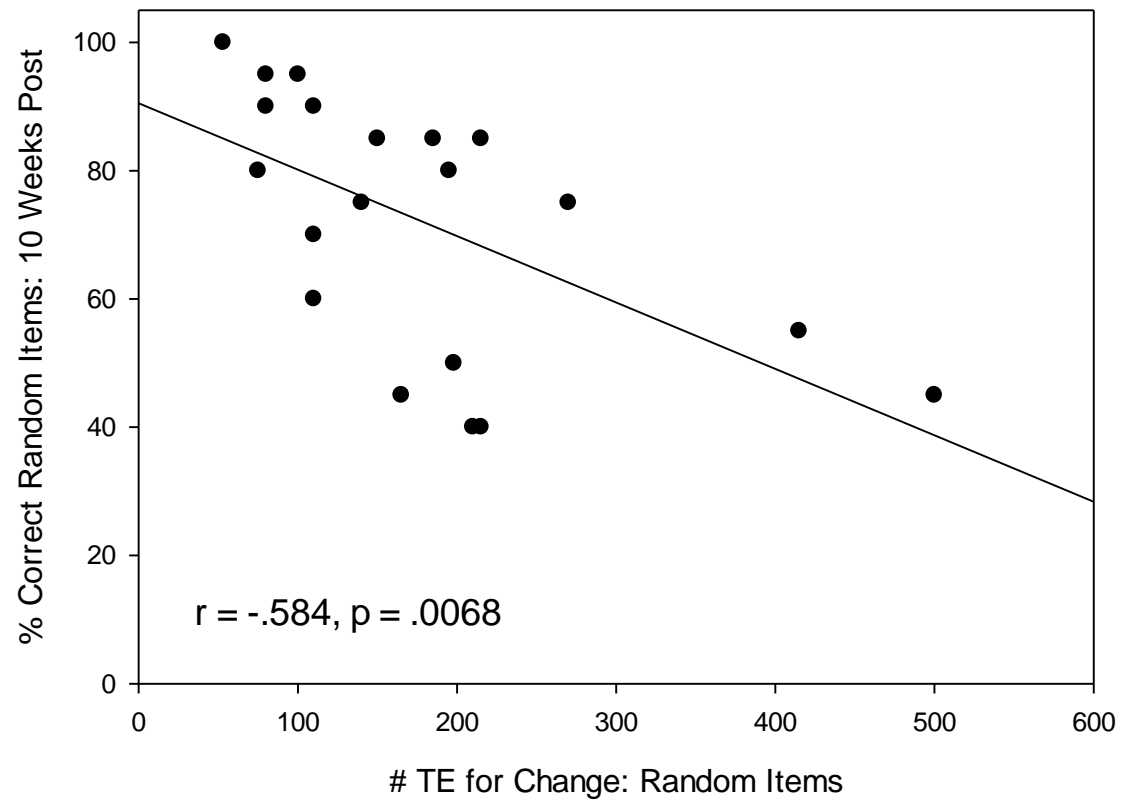



Supplemental Figure S9. Scatterplot depicting the relationship between ChangeSess and MasterySess for SPT-Random items.

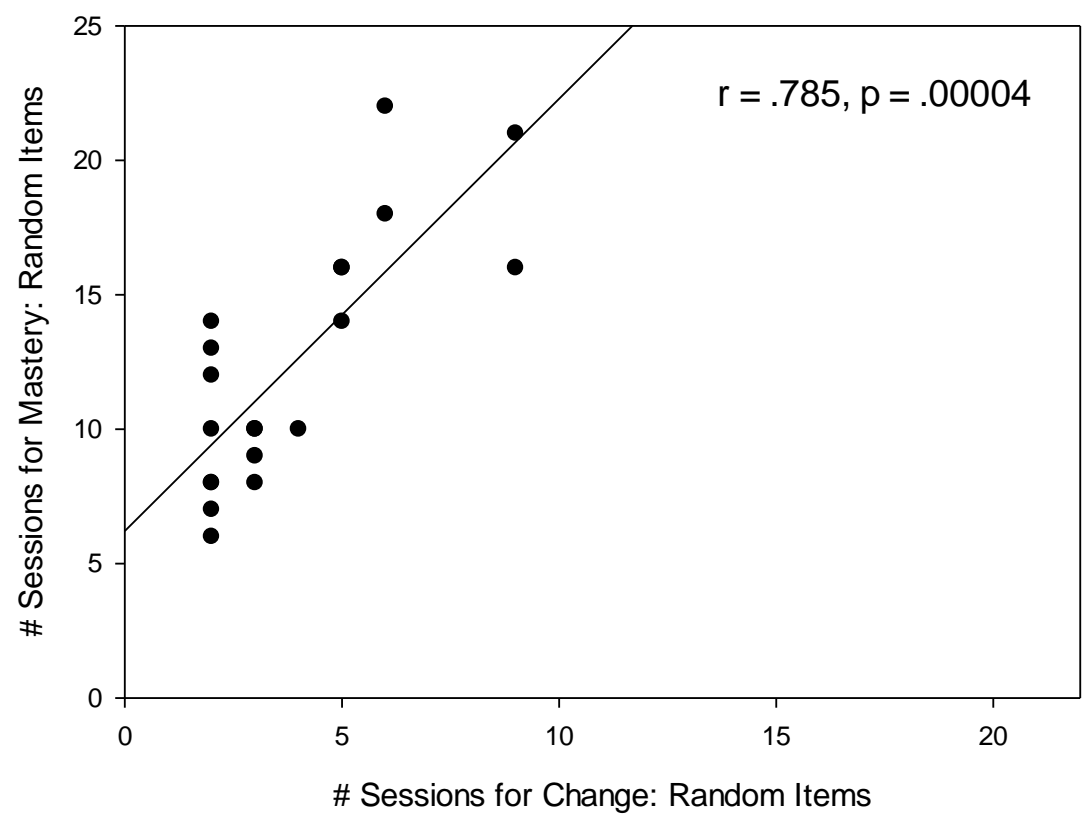

Supplemental Figure S10. Scatterplot depicting the relationship between ChangeSess and ChangeTE for SPT-Blocked items.

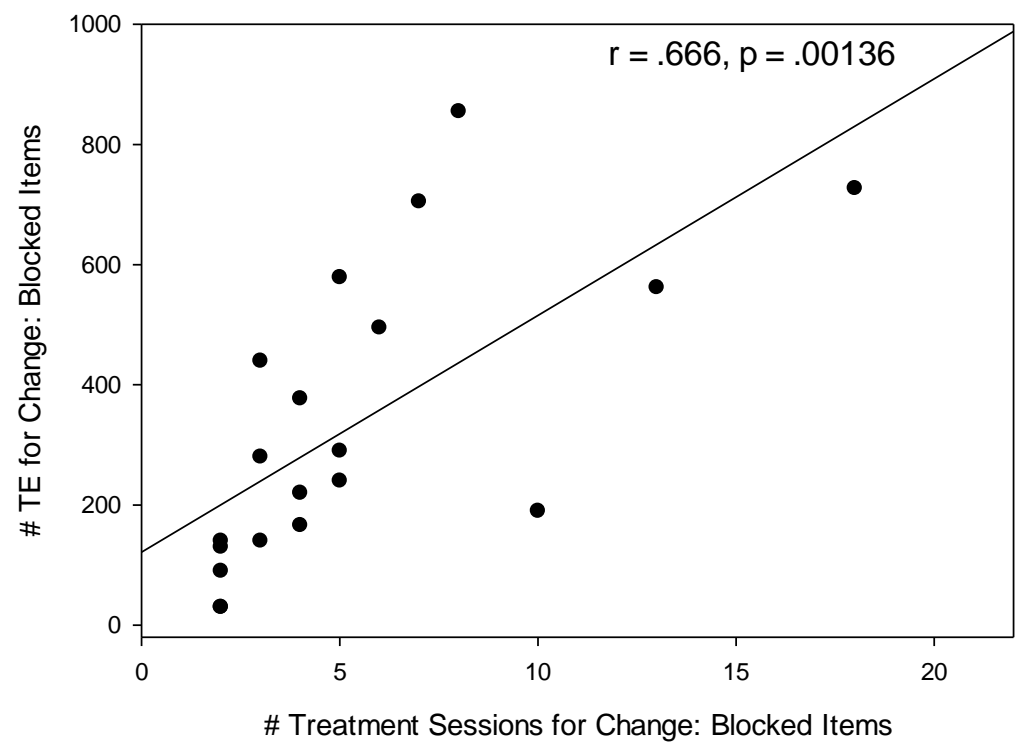

Supplemental Figure S11. Scatterplot depicting the relationship between ChangeSess and ChangeTE for SPT-Random items.

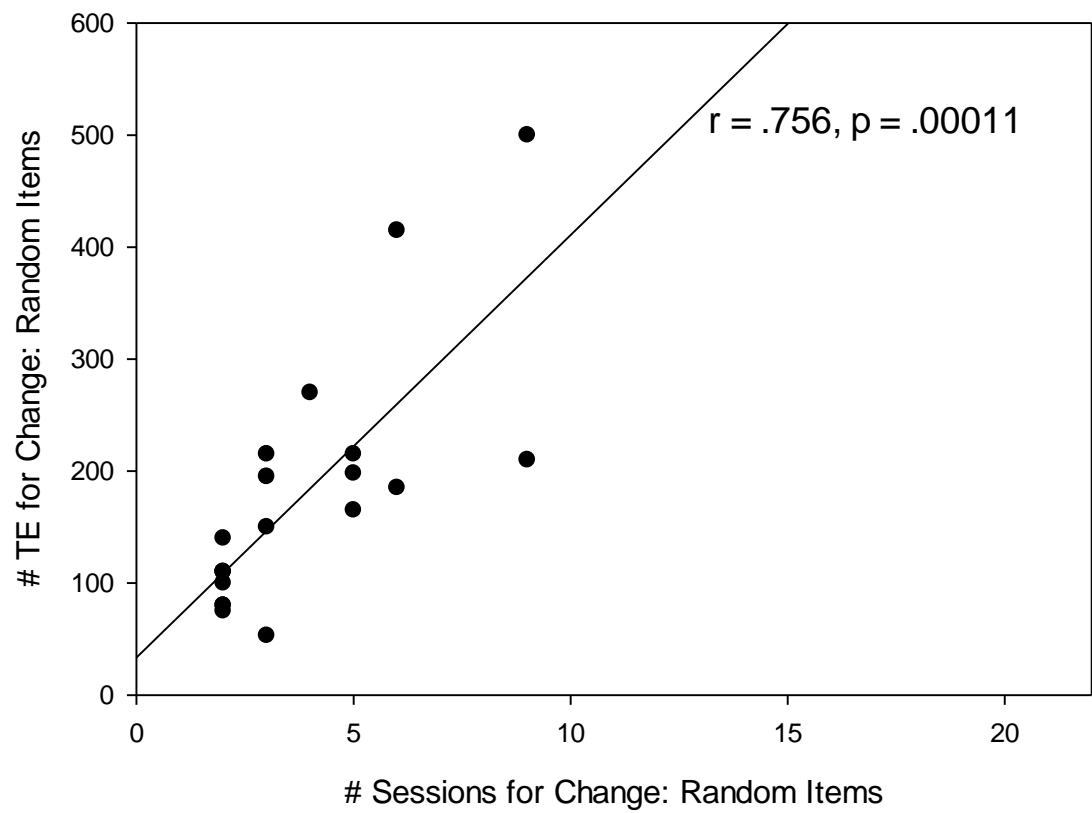

Supplemental Figure S12. Scatterplot depicting the relationship between ChangeTE and MasteryTE for SPT-Blocked items.

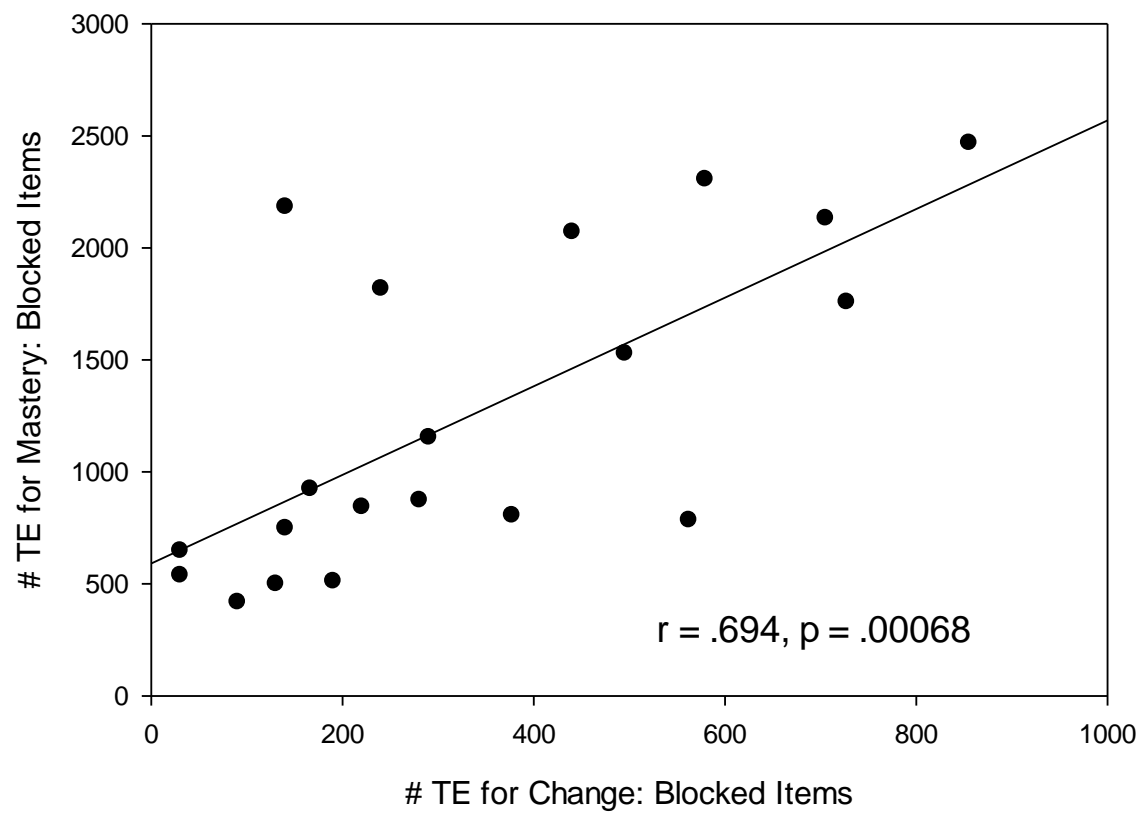

Supplement: Supplementary file 1 [file 1]
