# Supplementary material
Source: publisher figshare collection journal article supplement (https://asha.figshare.com/articles/dataset/_/12592190)
Supplement: Supplementary file 2 [file 1]

**Supplemental Material S1.** Summary data and statistics for individual participants.

|           |         |      | BL<br>mean | BL SD | Highest<br>BL | Change <sub>sess</sub> | Change <sub>TE</sub> | Mastery <sub>sess</sub> | Mastery <sub>TE</sub> | FU 2-<br>wk | FU-10<br>wk |
|-----------|---------|------|------------|-------|---------------|------------------------|----------------------|-------------------------|-----------------------|-------------|-------------|
| <b>P1</b> | Blocked | /pr/ | 12         | 8.37  | 20            | 2                      | 30                   | 22                      | 649                   | 50          | 40          |
|           |         | /ks/ | 6          | 5.48  | 10            | 2                      | 30                   | 22                      | 649                   | 70          | 50          |
|           | Random  | /gl/ | 20.83      | 15.05 | 40            | 8                      | 250                  | 22                      | 781                   | 40          | 80          |
|           |         | /nd/ | 15.83      | 12.4  | 40            | 4                      | 120                  | 22                      | 781                   | 50          | 90          |
| <b>P2</b> | Blocked | /sm/ | 10         | 6.33  | 20            | 2                      | 130                  | 4                       | 430                   | 100         | 50          |
|           |         | /f/  | 3.33       | 8.17  | 20            | 4                      | 430                  | 8                       | 1320                  | 90          | 60          |
|           | Random  | /bl/ | 0          | 0     | 0             | 4                      | 210                  | 12                      | 1630                  | 90          | 80          |
|           |         | /p/  | 2.86       | 4.69  | 10            | 2                      | 90                   | 6                       | 470                   | 100         | 90          |
| <b>P3</b> | Blocked | /gl/ | 0          | 0     | 0             | 2                      | 140                  | 18                      | 2020                  | 90          | 100         |
|           |         | /kw/ | 4.29       | 7.87  | 20            | 2                      | 140                  | 12                      | 1550                  | 100         | 80          |
|           | Random  | /θr/ | 0          | 0     | 0             | 4                      | 330                  | 10                      | 1230                  | 100         | 80          |
|           |         | /st/ | 20.63      | 11.24 | 40            | 2                      | 100                  | 6                       | 630                   | 100         | 90          |
| <b>P4</b> | Blocked | /θr/ | 2.5        | 4.63  | 10            | 2                      | 90                   | 6                       | 400                   | 80          | 70          |
|           |         | /gl/ | 10         | 10.69 | 30            | 10                     | 900                  | 18                      | 2660                  | 50          | 50          |
|           | Random  | /sn/ | 0          | 0     | 0             | 2                      | 80                   | 22                      | 2926                  | 50          | 70          |
|           |         | /kw/ | 14.74      | 13.49 | 40            | 10                     | 750                  | 14                      | 1320                  | 30          | 40          |
| <b>P5</b> | Blocked | /θ/  | 8          | 10.95 | 20            | 4                      | 664                  | 8                       | 1625                  | 80          | 100         |
|           |         | /s/* | 4          | 8.94  | 20            | 6                      | 494                  | 22                      | 2990                  | 40          | 20          |
|           | Random  | /br/ | 14.55      | 9.34  | 20            | 2                      | 110                  | 22                      | 2990                  | 80          | 40          |
|           |         | /l/  | 21.82      | 18.88 | 40            | 2                      | 110                  | 4                       | 275                   | 80          | 80          |
| <b>P6</b> | Blocked | /st/ | 0          | 0     | 0             | 2                      | 40                   | 14                      | 793                   | 100         | 60          |
|           |         | /dʒ/ | 4.44       | 8.82  | 20            | 6                      | 291                  | 22                      | 1057                  | 60          | 100         |
|           | Random  | /gl/ | 7.5        | 10    | 20            | 4                      | 75                   | 12                      | 630                   | 80          | 100         |
|           |         | /θ/  | 7.5        | 10    | 20            | 2                      | 30                   | 8                       | 280                   | 100         | 100         |
| <b>P7</b> | Blocked | /dʒ/ | 17.78      | 13.94 | 40            | 2                      | 90                   | 6                       | 220                   | 70          | 50          |
|           |         | /z/  | 18.89      | 16.92 | 40            | 2                      | 90                   | 14                      | 620                   | 40          | 40          |
|           | Random  | /g/  | 13.13      | 14.93 | 40            | 6                      | 210                  | 14                      | 740                   | 90          | 80          |
|           |         | /r/  | 3.75       | 6.19  | 20            | 4                      | 120                  | 18                      | 1060                  | 40          | 10          |

|     |         |       | BL mean | BL SD | Highest BL | Change <sub>sess</sub> | Change <sub>TE</sub> | Mastery <sub>sess</sub> | Mastery <sub>TE</sub> | FU 2-wk | FU-10 wk |
|-----|---------|-------|---------|-------|------------|------------------------|----------------------|-------------------------|-----------------------|---------|----------|
| P8  | Blocked | /g/   | 22.86   | 7.56  | 30         | 2                      | 30                   | 8                       | 450                   | 80      | 90       |
|     |         | /θ/   | 17.14   | 9.51  | 30         | 2                      | 30                   | 10                      | 630                   | 100     | 90       |
|     | Random  | /b/   | 0       | 0     | 0          | 2                      | 110                  | 12                      | 1500                  | 100     | 90       |
|     |         | /f/   | 37.5    | 16.93 | 60         | 2                      | 110                  | 8                       | 900                   | 90      | 90       |
| P9  | Blocked | /θ/   | 17.14   | 18    | 50         | 4                      | 110                  | 8                       | 190                   | 30      | 30       |
|     |         | /g/   | 4.28    | 7.87  | 20         | 22                     | 1013                 | 22                      | 1382                  | 40      | 10       |
|     | Random  | /f/   | 15.29   | 13.28 | 50         | 10                     | 570                  | 14                      | 1030                  | 70      | 30       |
|     |         | /br/  | 12.94   | 8.49  | 30         | 8                      | 430                  | 18                      | 1640                  | 70      | 60       |
| P10 | Blocked | /s/   | 13.33   | 8.17  | 20         | 2                      | 90                   | 10                      | 650                   | 100     | 90       |
|     |         | /bl/  | 15      | 5.48  | 20         | 4                      | 190                  | 12                      | 850                   | 90      | 80       |
|     | Random  | /f/   | 40      | 7.85  | 50         | 2                      | 100                  | 4                       | 330                   | 100     | 100      |
|     |         | /str/ | 20.71   | 6.16  | 30         | 2                      | 100                  | 8                       | 830                   | 100     | 90       |
| P11 | Blocked | /sn/  | 35      | 20.98 | 70         | 2                      | 130                  | 4                       | 380                   | 100     | 90       |
|     |         | /θ/   | 23.75   | 20.29 | 60         | 2                      | 130                  | 6                       | 640                   | 90      | 80       |
|     | Random  | /fl/  | 4.29    | 5.35  | 10         | 4                      | 290                  | 10                      | 1190                  | 100     | 80       |
|     |         | /dʒ/  | 12.86   | 9.51  | 30         | 2                      | 100                  | 10                      | 1190                  | 80      | 80       |
| P12 | Blocked | /k/   | 27      | 21.3  | 70         | 10                     | 1200                 | 12                      | 1610                  | 90      | 70       |
|     |         | /sm/  | 2.5     | 5.5   | 20         | 6                      | 510                  | 22                      | 3329                  | 50      | 40       |
|     | Random  | /fr/  | 3.75    | 5.18  | 10         | 2                      | 140                  | 16                      | 2730                  | 100     | 60       |
|     |         | /θ/   | 5       | 5.35  | 10         | 2                      | 140                  | 12                      | 1800                  | 100     | 90       |
| P13 | Blocked | /f/   | 6.32    | 12.12 | 50         | 4                      | 220                  | 6                       | 390                   | 70      | 90       |
|     |         | /gl/  | 0       | 0     | 0          | 4                      | 220                  | 14                      | 1300                  | 90      | 10       |
|     | Random  | /z/   | 1.43    | 3.78  | 10         | 2                      | 90                   | 8                       | 710                   | 70      | 50       |
|     |         | /st/  | 5.71    | 7.87  | 20         | 6                      | 450                  | 12                      | 1260                  | 100     | 100      |
| P14 | Blocked | /fl/  | 4.29    | 6.46  | 20         | 4                      | 180                  | 12                      | 1010                  | 100     | 80       |
|     |         | /kw/  | 13.57   | 10.08 | 30         | 6                      | 300                  | 20                      | 2630                  | 80      | 100      |
|     | Random  | /sn/  | 21.67   | 13.29 | 40         | 2                      | 110                  | 8                       | 620                   | 100     | 80       |
|     |         | /θr/  | 0       | 0     | 0          | 2                      | 110                  | 8                       | 620                   | 100     | 60       |

|            |         |      | BL<br>mean | BL SD | Highest<br>BL | Change <sub>sess</sub> | Change <sub>TE</sub> | Mastery <sub>sess</sub> | Mastery <sub>TE</sub> | FU 2-<br>wk | FU-10<br>wk |
|------------|---------|------|------------|-------|---------------|------------------------|----------------------|-------------------------|-----------------------|-------------|-------------|
| <b>P15</b> | Blocked | /θ/  | 27.69      | 23.86 | 60            | 4                      | 390                  | 6                       | 630                   | 80          | 80          |
|            |         | /fl/ | 0          | 0     | 0             | 4                      | 364                  | 10                      | 984                   | 80          | 40          |
|            | Random  | /s/  | 11.43      | 10.69 | 20            | 2                      | 75                   | 10                      | 905                   | 80          | 80          |
|            |         | /tr/ | 5.71       | 9.76  | 20            | 2                      | 75                   | 6                       | 445                   | 100         | 80          |
| <b>P16</b> | Blocked | /fl/ | 7.14       | 12.67 | 40            | 6                      | 623                  | 14                      | 1840                  | 100         | 60          |
|            |         | /sp/ | 1.43       | 5.35  | 20            | 8                      | 786                  | 18                      | 2428                  | 40          | 80          |
|            | Random  | /br/ | 5          | 9.26  | 20            | 6                      | 265                  | 16                      | 1160                  | 20          | 60          |
|            |         | /kw/ | 15         | 14.14 | 40            | 4                      | 130                  | 12                      | 750                   | 100         | 40          |
| <b>P17</b> | Blocked | /n/  | 0          | 0     | 0             | 6                      | 100                  | 20                      | 400                   | 30          | 40          |
|            |         | /st/ | 1.82       | 4.05  | 10            | 14                     | 280                  | 22                      | 627                   | 30          | 20          |
|            | Random  | /dʒ/ | 12         | 10.95 | 20            | 4                      | 60                   | 20                      | 570                   | 70          | 70          |
|            |         | /gl/ | 2          | 4.47  | 10            | 14                     | 360                  | 22                      | 627                   | 40          | 10          |
| <b>P18</b> | Blocked | /j/  | 7.69       | 11.66 | 40            | 22                     | 594                  | 22                      | 1760                  | 0           | 30          |
|            |         | /pl/ | 3.08       | 4.8   | 10            | 14                     | 860                  | 22                      | 1760                  | 30          | 20          |
|            | Random  | /s/  | 3.33       | 5.16  | 10            | 4                      | 140                  | 10                      | 800                   | 90          | 80          |
|            |         | /kw/ | 8.33       | 9.83  | 20            | 6                      | 290                  | 22                      | 1760                  | 70          | 0           |
| <b>P19</b> | Blocked | /θ/  | 0          | 0     | 0             | 2                      | 250                  | 6                       | 1010                  | 70          | 60          |
|            |         | /gl/ | 1.67       | 3.89  | 10            | 4                      | 630                  | 22                      | 3136                  | 50          | 50          |
|            | Random  | /j/  | 6          | 8.94  | 20            | 2                      | 80                   | 16                      | 2450                  | 100         | 80          |
|            |         | /sm/ | 0          | 0     | 0             | 2                      | 80                   | 8                       | 850                   | 100         | 100         |
| <b>P20</b> | Blocked | /ŋ/  | 15.24      | 7.5   | 30            | 4                      | 210                  | 16                      | 1720                  | 80          | 70          |
|            |         | /pl/ | 26.67      | 18.26 | 60            | 6                      | 370                  | 8                       | 590                   | 100         | 100         |
|            | Random  | /θ/  | 16.67      | 12.25 | 40            | 2                      | 80                   | 8                       | 520                   | 90          | 80          |
|            |         | /kr/ | 27.78      | 13.02 | 50            | 2                      | 80                   | 6                       | 370                   | 90          | 100         |

*Note.* BL = baseline; SD = standard deviation; Change<sub>sess</sub> = the number of treatment sessions needed to show change; Change<sub>TE</sub> = the number of teaching episodes needed to show change; Mastery<sub>sess</sub> = the number of treatment sessions needed to show mastery; Mastery<sub>TE</sub> = the number of teaching episodes needed to show mastery; FU = follow up; wk = week; /s/\* = /s/ blend.
